# Supplementary material
Source: publisher figshare collection journal article supplement (https://tandf.figshare.com/ndownloader/files/17921834)
Supplement: Supplementary file 1 [file 17921834]

**Supplementary Material. The APECI-ICF items with their ICF number within parenthesis and notes on the side marked with asterix**

**Part 1: Activities and participation**

*How much difficulties do you have with the following when exposed to such things that give you symptoms and/or when you try to avoid the exposure?*

1. Focusing attention on a task (d160)
2. Reading (d166)
3. Calculating, such as calculating the sum of two figures or comparing prices in a store, etc (d172)
4. Solving problems (d175)
5. Moving around within all parts of your home, i.e. in an apartment or house, in a stairwell on a balcony/patio, and around the entrance (d4600)
6. Moving around within buildings other than your home, i.e. private and public buildings in the community (d4601)
7. Taking a taxi (d4701)
8. Using public transportation, i.e. going by bus, train, subway, airplane, etc. (d4702)
9. Visiting restrooms that are cleaned with scented detergent and/or where there is scented soap and/or air fresheners (d5308)
10. Visiting health care facilities, including dental care (d5708)
11. Acquiring a place to live (rented or purchased) where you are not exposed to chemicals/odorous substances that induce symptoms (d6108)
12. Living in an apartment building where you share ventilation and stairwell with neighbors and have close to other balconies/patios (d698)
13. Washing and drying clothes in common laundry rooms i.e. used by several households (d6408)
14. Acquisition of goods and services for daily life, i.e. food, clothes, hygiene products, detergents, and household articles (d620)
15. Having relationships with your children (7600)
16. Having relationships with your parents (7601)
17. Having relationships with your siblings (7602)
18. Having relationships with extended family members i.e. cousins, aunts, uncles, grandparents, parents/sisters/brothers in law (7603)
19. Having marital, romantic or sexual relationships, i.e. with man/wife, partner, boyfriend/girlfriend (770)
20. Interacting according to social rules. Not being able to do so implies being forced to do something that might feel socially unacceptable\* (7203)
21. Having relationships with friends (7500)
22. Having relationships with neighbors (7501)
23. Having relationships with acquaintances, i.e. persons you know but are not close friends with (7502)
24. Attending comprehensive school, i.e. attending school regularly, participate in lessons and working cooperatively with other students (d820)
25. Attending university and college, i.e. participate in all activities that are included in the course or the educational program (d830)

26. Attending other kind of education, e.g. labour market training or further education within an employment (839)
27. Seeking employment, i.e. finding work and complete tasks required for employment, e.g. job interview (d8450)
28. Working full-time that is not accommodated\*\*, i.e. doing the required tasks of the job and attending work on time as required (d8502)
29. Working part-time that is not accommodated\*\*, i.e. doing the required tasks of the job and attending work on time as required (d8501)
30. Working with accommodated\*\* work, i.e. doing the required tasks of the job and attending work on time as required (d859)
31. Having enough income through work, sickness allowance, unemployment allowance, financial support, to cover your expenses and make it possible for you to provide for yourself (d8708)
32. Engaging in social or community associations organized by people with common interests, such as local social clubs or ethnic groups (d9100)
33. Engaging in social ceremonies, such as marriages and funerals (d9102)
34. Engaging in competitive and informally or formally organized games or athletic events, such as hockey or soccer (d9201)
35. Engaging in cultural events, such as going to the cinema, theatre, museum or art gallery (d9202)
36. Socializing, i.e. engaging in social gatherings with others, such as visiting other persons or meeting them in public places (d9205)
37. Making holiday trips i.e. travel to and staying at the destination including living in hotel/hostel (d9208)

\* i.e. not being able to sit next to someone who wears perfume, reject visitors who wear perfume, reject a hug, ask someone to use a different hygiene product

\*\* accommodated refers to work that is completely accommodated for you regarding CI, i.e. working from home

## **Part 2: Environmental factors that may be barriers**

*How large barrier is the following for you regarding the intolerance to chemicals and/or scents?*

1. Products, such as clothes, textiles, furniture, electronics and cleaning products that are perfumed or treated with chemicals that induce symptoms (e1150)
2. Flowers with a strong scent such as lilies or hyacinths? (e2208)
3. Scent machines and air fresheners that spread scents in private or public buildings e.g. in stores or hotels (e198)
4. Indoor air containing particles from perfume, smoke or chemicals e.g. detergents or flame retardants (e2600)
5. Outdoor air containing particles from exhaust gas or smoke (e2601)
6. Attitudes of colleagues that influence their behavior and actions towards you (e425)
7. Attitudes of persons in positions of authority\* that influence their behavior and actions towards you (e430)
8. Attitudes of health care professionals that influence their behavior and actions towards you (e450)

9. Societal attitudes\*\* that influence a group's or individuals' behavior and actions (e460)

\* Persons in positions of authority with decision-making responsibility, e.g. employer, administrative official for social service or the Social Insurance Agency

\*\* General or specific opinions and beliefs generally held by people of a culture, society, subcultural or other social group

### **Part 3: Environmental factors that may be facilitators**

*To what extent does the following facilitate (or would facilitate) for you regarding the intolerance to chemicals and/or scents?*

1. Supportive products for use in daily life, e.g. air cleaner, respiratory mask, central vacuum cleaning, and a washing machine and dryer of your own (e1158)
2. General products and technology for communication, such as telephone or Internet for calling friends or shopping on the Internet (e1250)
3. Products and technique that enable distance studies (including from home), e.g. Web-based solutions for lectures, seminars (e1308)
4. Products and technique that enable distance work (including from home), e.g. Web-based solutions to perform job assignments (e1358)
5. Good ventilation in buildings for public use, such as work places, schools, shops, gyms (e1508)
6. Good ventilation in buildings for private use, such as your own home or friends' homes (e1558)
7. Support from colleagues (325)
8. Support from persons in positions of authority\* (e330)
9. Support from health care professionals (e355)
10. Social security services\*\* that provide economic support/allowance, e.g. for sickness, occupational injury and disability (e570)
11. Housing services\*\*\* that provide support to persons with disabilities to enable appropriate habitation (e5258)

\* Persons in positions of authority with decision-making responsibility, e.g. employer, administrative official for social service or the Social Insurance Agency

\*\* Allowance that one can obtain through the Social Insurance Agency, e.g. sickness allowance and allowance for additional costs due to sickness or disability

\*\*\* Could among other things be priority to special apartments (e.g. low buildings with own/separate entrance and washing machine) provided by housing offices or enabled with allowance for home equipment
